# Supplementary material for: La música instrumental de José Castel (1737-1807)
Source: Royal Society of Chemistry journal article supplement (doi:10.1039/b511517e), 2006-01-01
Supplement: b511517e.pdf [file b511517e.pdf]

## Electronic Supplementary Information

### Anion-directed self-organization of thermotropic liquid crystalline materials containing a guanidinium moiety

Dongwoo Kim, Sangyong Jon, Hyung-Kun Lee, Kangkyun Baek, Nam-Keun Oh, Wang-Cheol Zin, and Kimoon Kim\*

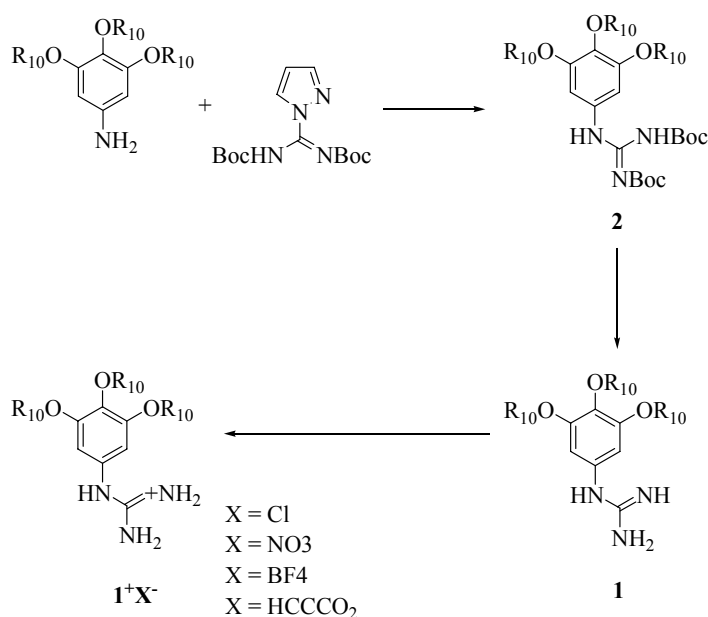

#### 1. Experimental section

**General Methods.** <sup>1</sup>H NMR spectra and <sup>13</sup>C NMR spectra were taken on a Bruker DPX-300 or DRX-500 spectrometer. All chemical shifts are reported in parts per million downfield from internal TMS (tetramethylsilane). The optical textures of the mesophases were studied with a Zeiss JENALAB-pol polarizing microscope equipped with a Linkam LTS 350 hot stage, a TMS 93 temperature controller and SDC-460M CCD camera. Transition temperatures and enthalpies were measured with a Perkin-Elmer Pyris differential scanning calorimeter operated at a scanning rate of 10 °C/min. All chemicals were of reagent grade and were used without further purification except as noted below.

**X-ray diffraction studies.** The X-ray diffraction experiments were performed in a transmission mode with synchrotron radiation at the Pohang Accelerator Laboratory (Beamline 3C2). To investigate structural changes on heating, samples were held in an aluminum sample holder, which was sealed with 7 μm thick Kapton films on both sides. The samples were heated with two cartridge heaters and the sample temperature was monitored by a thermocouple placed close to the samples.

### **1,2-Bis(*tert*-butyloxycarbonyl)-3-(3,4,5-tridecyloxyphenyl)-guanidine, 2**

A solution of 3,4,5-tridecyloxyaniline<sup>1</sup> (520 mg, 1.68 mmol) and 1-*H*-pyrazole-1-(*N,N'*-bis(*tert*-butyloxycarbonyl))carboxamidine<sup>2</sup> (1.41 g, 2.51 mmol) in CHCl<sub>3</sub> (20 mL) was stirred at room temperature for 60 h. The mixture was concentrated under a reduced pressure. The resulting oil was purified by chromatography on silica gel by eluting 10 % ethyl acetate in hexane to give **2** (1.02 g, 76.0 %). <sup>1</sup>H NMR (CDCl<sub>3</sub>, 500 MHz)  $\delta$  11.5 (s, 1H), 10.1 (s, 1H), 6.89 (s, 2H), 3.96 (t, 4H), 3.90 (t, 2H), 1.72 – 1.80 (m, 6H), 1.53 (s, 9H), 1.48 (s, 9H), 1.45 – 1.46 (m, 6H), 1.27 (m, 36H), 0.88 (t, 9H). <sup>13</sup>C NMR (CDCl<sub>3</sub>, 125 MHz)  $\delta$  163.61, 153.54, 153.40, 153.13, 135.47, 132.41, 101.50, 83.87, 79.48, 73.68, 69.30, 32.17, 32.14, 29.97, 29.90, 29.88, 29.84, 29.81, 29.62, 29.58, 29.53, 28.42, 28.32, 26.35, 26.28, 22.91, 14.33. MS (FAB, *m/z*), [*M*+*H*]<sup>+</sup> 804.63. Anal. Calc. for C<sub>47</sub>H<sub>85</sub>N<sub>3</sub>O<sub>7</sub>: C, 70.19; H, 10.65; N, 5.23. Found: C, 70.06; H, 10.95; N, 5.28.

### **3,4,5-Tridecyloxyphenylguanidine, 1**

A solution of **2** (794 mg, 0.99 mmol) and trifluoroacetic acid (5 mL) in dichloromethane (5 mL) was stirred at room temperature for 10 h. The solvent was evaporated under a reduced pressure. The resulting mixture was dissolved in diethyl ether (10 mL) and washed with 25 % NaOH aqueous solution, water and brine, sequentially. The solvent was removed *in vacuo* and the resulting oil was recrystallized from acetonitrile at –4 °C to give **6** (1.07 g, 86 %). <sup>1</sup>H NMR (CDCl<sub>3</sub>, 500 MHz)  $\delta$  6.14 (s, 2H), 4.05 (br, 3H), 3.89 – 3.93 (m, 6H), 1.71 – 1.80 (m, 6H), 1.44 – 1.46 (m, 6H), 1.27 – 1.30 (m, 36H), 0.88 (t, 9H). <sup>13</sup>C NMR (CDCl<sub>3</sub>, 125 MHz)  $\delta$  153.79, 151.81, 144.75, 133.89, 101.78, 73.70, 69.18, 32.12, 30.55, 29.97, 29.86, 29.80, 29.64, 29.56, 26.37, 26.33, 22.89, 14.31. MS (FAB, *m/z*), [*M*+*H*]<sup>+</sup> 604.56. Anal. Calc. for C<sub>37</sub>H<sub>69</sub>N<sub>3</sub>O<sub>3</sub>: C, 73.58; H, 11.52; N, 6.96. Found: C, 73.15; H, 11.58; N, 6.82.

### **3,4,5-Tridecyloxyphenylguanidinium chloride, 1<sup>+</sup>Cl<sup>-</sup>**

Aqueous HCl solution (35 %, 163  $\mu$ L, 2.40 mmol) was added to a methanol solution (5 mL) of **1** (146 mg, 0.240 mmol) and the mixture was stirred at room temperature for 7 h. After cooling to –4 °C, the resulting waxy solid was filtered, washed with MeOH, MeOH-water (1:1) (50.2 mg, 32 %). <sup>1</sup>H NMR (CDCl<sub>3</sub>, 300 MHz)  $\delta$  9.52 (br s, 1H), 7.95 (br s, 4H), 6.42 (s, 2H), 3.90 – 3.95 (m, 6H), 1.53 – 1.82 (m, 6H), 1.46 (m, 6H), 1.27 (m, 36H), 0.88 (t, 9H). <sup>13</sup>C NMR (CDCl<sub>3</sub>, 75 MHz)  $\delta$  157.57, 154.32, 138.14, 128.49, 104.71, 73.77, 69.57, 32.13, 30.51, 29.96, 29.90, 29.85, 29.80, 29.61, 29.57, 29.47, 26.29, 22.90, 14.33. Anal. Calc. for C<sub>37</sub>H<sub>70</sub>ClN<sub>3</sub>O<sub>3</sub>: C, 69.39; H, 11.02; N, 6.56. Found: C, 69.05; H, 11.58; N, 6.41.

### **3,4,5-Tridecyloxyphenylguanidinium nitrate, 1<sup>+</sup>NO<sub>3</sub><sup>-</sup>**

This compound was prepared from **1** (154 mg, 0.250 mmol) and 61 % HNO<sub>3</sub> solution (101  $\mu$ L, 2.50 mmol) by the same method as for **1<sup>+</sup>Cl<sup>-</sup>** (115 mg, 68 %). <sup>1</sup>H NMR (CDCl<sub>3</sub>, 300 MHz)  $\delta$  9.50 (br s, 1H), 8.02 (br s, 4H), 6.42 (s, 2H), 3.93 (m, 6H), 1.79 (m, 6H), 1.45 (m, 6H), 1.27 (m, 36H), 0.88 (t, 9H). <sup>13</sup>C NMR (CDCl<sub>3</sub>, 75 MHz)  $\delta$  156.90, 154.25, 137.76, 129.19, 104.27, 73.76, 69.47, 32.14, 32.11, 30.45, 29.95, 29.88, 29.83, 29.79, 29.58, 29.55, 29.45, 26.25, 22.88, 14.30. Anal. Calc. for C<sub>37</sub>H<sub>70</sub>N<sub>4</sub>O<sub>6</sub>: C, 66.63; H, 10.58; N, 8.40. Found: C, 67.05; H, 11.21; N, 8.25.

### **3,4,5-Tridecyloxyphenylguanidinium tetrafluoroborate, 1<sup>+</sup>BF<sub>4</sub><sup>-</sup>**

This compound was prepared from **1** (147 mg, 0.240 mmol) and 48 % HBF<sub>4</sub> solution (226 µL, 2.40 mmol) by the same method as for **1**<sup>+</sup>Cl<sup>-</sup> (80.5 mg, 48 %). <sup>1</sup>H NMR (CDCl<sub>3</sub>, 300 MHz) δ 8.01 (br s, 1H), 6.43 (s, 2H), 6.37 (br s, 4H), 3.90-3.95 (m, 6H), 1.70-1.81 (m, 6H), 1.46 (m, 6H), 1.27 (m, 36H), 0.88 (t, 9H). <sup>13</sup>C NMR (CDCl<sub>3</sub>, 75 MHz) δ 156.44, 154.29, 138.03, 128.45, 104.57, 73.85, 69.51, 32.14, 32.52, 29.97, 29.87, 29.83, 29.67, 29.59, 29.50, 29.32, 22.90, 14.31. Anal. Calc. for C<sub>37</sub>H<sub>70</sub>BF<sub>4</sub>N<sub>3</sub>O<sub>3</sub>·H<sub>2</sub>O: C, 62.61; H, 10.22; N, 5.92. Found: C, 62.91; H, 10.78; N, 5.84.

### 3,4,5-Tridecyloxyphenylguanidinium propiolate, **1**<sup>+</sup>HCCCO<sub>2</sub><sup>-</sup>

This compound was prepared from **1** (126 mg, 0.201 mmol) and propiolic acid (128 µL, 2.01 mmol) by the same method as for **1**<sup>+</sup>Cl<sup>-</sup> (44.6 mg, 32 %). <sup>1</sup>H NMR (CDCl<sub>3</sub>, 300 MHz) δ 10.32 (s, 1H), 8.01 (br s, 4H), 6.40 (s, 2H), 3.90-3.95 (m, 6H), 2.46 (s, 1H), 1.70-1.81 (m, 6H), 1.46 (m, 6H), 1.27 (m, 36H), 0.88 (t, 9H). <sup>13</sup>C NMR (CDCl<sub>3</sub>, 75 MHz) δ 159.72, 157.51, 154.25, 137.83, 129.57, 104.59, 80.86, 73.77, 69.57, 68.18, 32.13, 30.53, 29.96, 29.90, 29.85, 29.62, 29.57, 29.52, 26.30, 22.90, 14.32. Anal. Calc. for C<sub>39</sub>H<sub>71</sub>N<sub>3</sub>O<sub>2</sub>·H<sub>2</sub>O: C, 69.42; H, 10.63; N, 6.07. Found: C, 70.05; H, 10.63; N, 5.84.

### References

1. Zinsou, A.; Veber, M.; Strzelecka, H.; Jallabert, C.; Fourre, P. *New. J. Chem.* **1993**, *17*, 309.
2. Bernatowicz, M. S.; Wu, Y.; Matsueda, G. R. *Tetrahedron Lett.* **1993**, *34*, 3389.

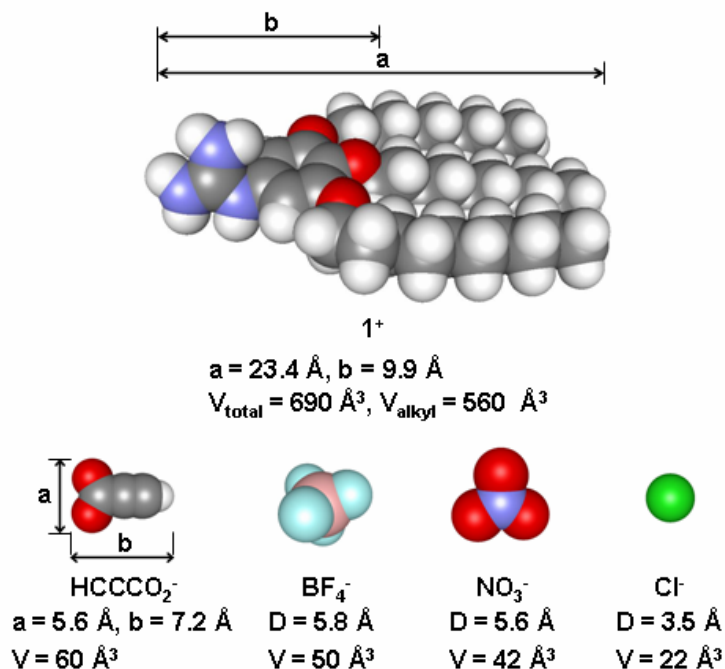

Fig. S1. Space-filling models of **1** and guest anions. Their size and volume were calculated using Cerius<sup>2</sup>
